# Supplementary material for: Associations of arterial carbon dioxide and arterial oxygen concentrations with hospital mortality after resuscitation from cardiac arrest
Source: Springer Nature journal article supplement (doi:10.1186/s13054-015-1067-6), 2015-09-28

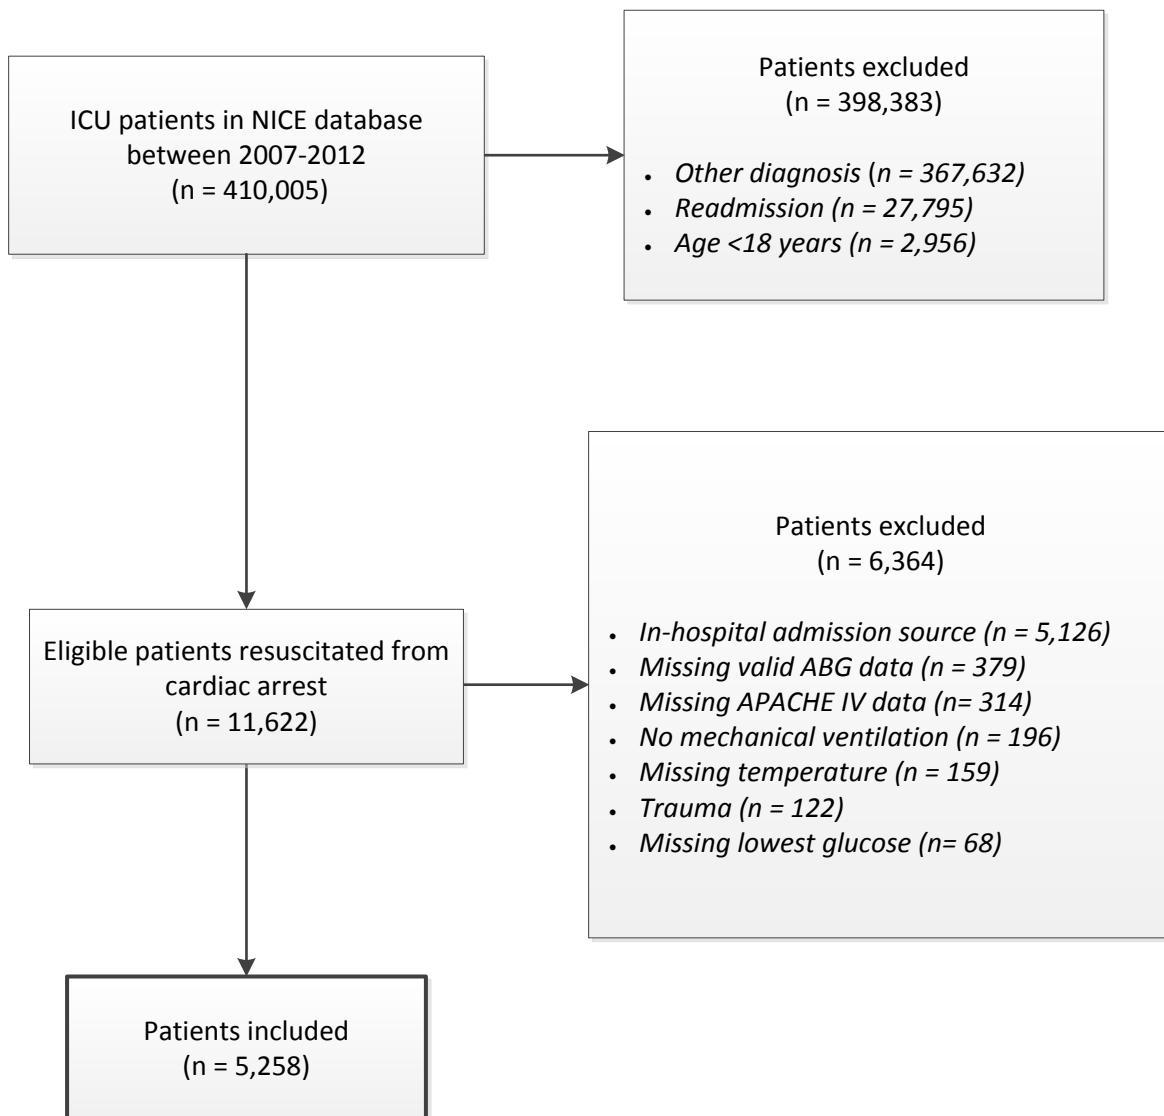

Supplement: MOESM1 [file 9780742]
